# Analysis of Transcriptional Regulatory Pathways of Photoreceptor Genes by Expression Profiling of the *Otx2*-Deficient Retina

Yoshihiro Omori<sup>1,2,3\*</sup>, Kimiko Katoh<sup>1\*</sup>, Shigeru Sato<sup>1,4,5\*</sup>, Yuki Muranishi<sup>1</sup>, Taro Chaya<sup>1,2</sup>, Akishi Onishi<sup>1,2</sup>, Takashi Minami<sup>6</sup>, Takashi Fujikado<sup>4,5</sup>, Takahisa Furukawa<sup>1,2\*</sup>

**1** Department of Developmental Biology, Osaka Bioscience Institute, Osaka, Japan, **2** JST, CREST, Osaka, Japan, **3** PRESTO, Suita, Osaka, Japan, **4** Department of Ophthalmology, Osaka University Graduate School of Medicine, Suita, Osaka, Japan, **5** Department of Visual Science, Osaka University Graduate School of Medicine, Suita, Osaka, Japan, **6** The Research Center for Advanced Science and Technology, The University of Tokyo, Tokyo, Japan

## Abstract

In the vertebrate retina, the *Otx2* transcription factor plays a crucial role in the cell fate determination of both rod and cone photoreceptors. We previously reported that *Otx2* conditional knockout (CKO) mice exhibited a total absence of rods and cones in the retina due to their cell fate conversion to amacrine-like cells. In order to investigate the entire transcriptome of the *Otx2* CKO retina, we compared expression profile of *Otx2* CKO and wild-type retinas at P1 and P12 using microarray. We observed that expression of 101- and 1049-probe sets significantly decreased in the *Otx2* CKO retina at P1 and P12, respectively, whereas, expression of 3- and 4149-probe sets increased at P1 and P12, respectively. We found that expression of genes encoding transcription factors involved in photoreceptor development, including *Crx*, *Nrl*, *Nr2e3*, *Esrrb*, and *NeuroD*, was markedly down-regulated in the *Otx2* CKO at both P1 and P12. Furthermore, we identified three human retinal disease loci mapped in close proximity to certain down-regulated genes in the *Otx2* CKO retina including *Ccdc126*, *Tnfrsf13* and *Pitpnm1*, suggesting that these genes are possibly responsible for these diseases. These transcriptome data sets of the *Otx2* CKO retina provide a resource on developing rods and cones to further understand the molecular mechanisms underlying photoreceptor development, function and disease.

**Citation:** Omori Y, Katoh K, Sato S, Muranishi Y, Chaya T, et al. (2011) Analysis of Transcriptional Regulatory Pathways of Photoreceptor Genes by Expression Profiling of the *Otx2*-Deficient Retina. PLoS ONE 6(5): e19685. doi:10.1371/journal.pone.0019685

**Editor:** Karl-Wilhelm Koch, University of Oldenburg, Germany

**Received:** February 1, 2011; **Accepted:** April 4, 2011; **Published:** May 13, 2011

**Copyright:** © 2011 Omori et al. This is an open-access article distributed under the terms of the Creative Commons Attribution License, which permits unrestricted use, distribution, and reproduction in any medium, provided the original author and source are credited.

**Funding:** This work was supported by CREST and PRESTO (#4118) from Japan Science and Technology Agency (<http://www.jst.go.jp/>), and a Grant for Molecular Brain Science, a Grant-in-Aid for Scientific Research (B) (#20390087), Young Scientists (B) (#21790295), from Ministry of Education, Culture, Sports, Science and Technology (<http://www.jsps.go.jp/>), The Takeda Science Foundation (<http://www.takeda-sci.or.jp/>), The Uehara Memorial Foundation (<http://www.ueharazaidan.com/>), Naito Foundation (<http://www.naito-f.or.jp/>), Novartis Foundation (#20-10, <http://novartisfound.or.jp/>), Mochida Memorial Foundation for Medical and Pharmaceutical Research (<http://www.mochida.co.jp/zaidan/>), Senri Life Science Foundation (#S-2144, <http://www.senri-life.or.jp/>), Kato Memorial Bioscience Foundation (<http://www.katokenen.or.jp/>), and Japan National Society for the Prevention of Blindness (<http://www.nichigan.or.jp/link/situmei.jsp>). The funders had no role in study design, data collection and analysis, decision to publish, or preparation of the manuscript.

**Competing Interests:** The authors have declared that no competing interests exist.

\* E-mail: furukawa@obi.or.jp

† These authors contributed equally to this work.

## Introduction

During mammalian retinogenesis, five major types of neurons arise from multipotent progenitor cells, which are common precursors for all retinal neurons and glia [1,2,3]. We previously demonstrated that *Otx2*, an *Otx*-like homeobox gene, is essential for the cell fate determination of retinal photoreceptor cells [4]. *Otx2* conditional knockout (CKO) mice showed a cell fate switch from retinal photoreceptor precursor cells to amacrine-like cells. On the other hand, several transcription factors including *Crx*, *Nrl* and *Nr2e3* are essential for terminal differentiation of photoreceptors. *Crx* encodes an *Otx*-like homeodomain transcription factor essential for terminal differentiation of both rods and cones by regulating genes encoding phototransduction, photoreceptor metabolism and outer segment formation [5,6]. *Crx* knockout (KO) mice develop aberrant photoreceptors that lack both rod and cone photoresponses [7]. In humans, mutations in *CRX* are associated with retinal degeneration diseases such as cone-rod

dystrophy-2, retinitis pigmentosa (RP), and Leber congenital amaurosis (LCA) [6,8,9,10]. *Nrl* (neural retina leucine zipper gene) is a transcription factor of the leucine zipper family expressed predominantly in rods but not in cones [11]. Mice lacking the *Nrl* gene do not develop rods but produce an increased number of short wavelength-sensitive cones (S-cones) [12]. *Nrl* promotes rod development by directly activating rod-specific genes while simultaneously suppressing the S-cone related genes through the activation of transcriptional repressor Nuclear receptor subfamily 2 group E member 3 (*Nr2e3*) [12]. Mutations in human *NR2E3* cause enhanced S-cone syndrome [13]. The *rd7* mouse has a genetic defect in the *Nr2e3* gene and exhibits an increased number of cones [14]. Mice lacking retinoid-related orphan nuclear receptor  $\beta$  (*Rorb*) were shown to lose rods but overproduce primitive S-cones, similar to *Nrl* KO mice [15]. In addition, several other nuclear receptors are involved in both photoreceptor development and transcriptional regulation of photoreceptor-specific genes. During the terminal differentiation of cone

photoreceptors, thyroid hormone receptor  $\beta 2$  (*Trb2*) is critical for M-opsin induction [16], whereas retinoid X receptor  $\gamma$  (*Rxrg*) is essential for suppressing S-opsin in cone photoreceptors [17]. Retinoic acid receptor-related orphan receptor  $\alpha$  (*Rora*) directly controls expression of cone opsins and *arrestin3* [18]. In rod photoreceptor cells, estrogen-related receptor  $\beta$  (*Esrrb*) regulates expression of rod-specific genes and controls rod photoreceptor survival [19]. Recently, *Pias3*, an E3 SUMO ligase which is selectively expressed in developing photoreceptors, was shown to SUMOylate *Nr2e3* and promote the differentiation of rod-photoreceptors [20]. In addition, *Pias3* regulates expression of cone opsins by modulating *Rxrg*, *Rora*, and *Trb1* [21].

During the terminal differentiation of photoreceptors, the photoreceptor axon terminal develops a highly specialized synapse, the ribbon synapse, which connects photoreceptor axonal terminals with bipolar and horizontal dendritic terminals in the outer plexiform layer (OPL) of the retina [22]. The functional ribbon synapse structure is organized by the precise assembly of presynaptic components including CtBP2, bassoon, pikachurin, CaBP4 and *Cacna1f* [23,24,25,26]. Photoreceptor cells develop the photosensitive outer segments which contain molecules involved in phototransduction, such as opsins and transducins, and outer segment morphogenesis factors, such as *Rom1* and *Peripherin2* [27]. Outer segments are formed from the primary cilia [28]. In humans disruption of photoreceptor ciliary function causes retinal diseases including retinitis pigmentosa, Bardet-Biedl syndrome (BBS) and Nephronophthisis (NPHP) [27,29,30]. Mutations in genes encoding ciliary components including *Rpgrip1*, *Rp1*, and *Mak* cause photoreceptor degeneration and retinal dysfunction in mice [31,32,33].

To our knowledge, the *Otx2* CKO mouse is the only mutant which shows defects of both rods and cones in the retina from early developmental stages. In this study, we investigated the transcriptional profile of both developing rods and cones by taking advantage of the *Otx2* CKO retina.

## Results

### Identification of differentially expressed genes in the *Otx2* CKO retina

In order to clarify the molecular role of *Otx2* in transcriptional regulation during development, we investigated the expression profile of the *Otx2* CKO retina compared with that of the control retina with the genotype *Otx2<sup>fllox/fllox</sup>/Crx-cre* using microarrays at two time points, postnatal day 1 (P1) and P12. From middle late embryonic stages cones are generated with almost all of the cones formed by P0 [34]. Rods begin to form in embryonic stages whereas, photoreceptor maturation, including ribbon synapse and outer segment formation, occurs in P0 to P14 [35,36]. By P12, all photoreceptor cells are born, however, photoreceptor maturation, such as outer segment formation, is ongoing. Thus, we expect that the expression profile at P1 will mainly reflect cone development and early rod development, and the expression profile at P12 will mainly reflect rod development.

We performed genome-wide expression profiling using a microarray containing 45,101 probe sets covering more than 34,000 genes (Mouse Genome 430 2.0; Affymetrix). In the *Otx2* CKO retina at P1, we identified 101 down-regulated probes (signal log ratio  $\leq -1.0$ , signal intensity  $\geq 50$ ) and 3 up-regulated probes (signal log ratio  $\geq +1.0$ , signal intensity  $\geq 50$ ) compared to the control retina at P1. In the *Otx2* CKO retina at P12, we identified 1049 down-regulated probes (signal log ratio  $\leq -1.0$ , signal intensity  $\geq 50$ ) and 4149 up-regulated probes (signal log ratio  $\geq +1.0$ , signal intensity  $\geq 50$ ) compared to the control retina at P12.

To compare the features of these groups of probe sets, we categorized functions of these genes based on their gene ontology (GO) term annotations (Fig. 1). Genes involved in “phototransduction” and “ciliary function” in the photoreceptor cells were observed in the groups with down-regulated expression in the *Otx2* CKO retina at both P1 and P12. The proportion of probe sets involved in these categories increased in the P12 down-regulated group (21% for phototransduction, 6% for ciliary function) compared to P1 down-regulated group (8% for phototransduction, 1% for ciliary function). We found that the proportion of genes categorized in “cell cycle” and “transcription” in the up-regulated probes in the *Otx2* CKO retina was higher than that in down-regulated probes both at P1 and P12.

Using the data from three independent microarray experiments at P1 and P12, we performed hierarchical clustering analysis on 46 strongly down-regulated genes (signal log ratio  $\leq -5.0$ , signal intensity  $\geq 100$ , Table 1) and 37 up-regulated genes (signal log ratio  $\geq +3.0$ , signal intensity  $\geq 100$ , Table 2) in the *Otx2* CKO retina at P12 (Fig. 2). Expression levels of all of strongly down-regulated genes were more than 10 times higher in the P12 control retina compared to those of P1. Most of these down-regulated genes encode known photoreceptor-associated genes including transcription factors (*Crx*, *Nrl*, *Nr2e3*), and phototransduction molecules (*Rho*, *Opm1mw*, *Pde6a*, *Pde6b*, *Cnga1*) (Fig. 2, Table 1). We also confirmed that the genes encoding photoreceptor ciliary and ribbon synaptic components including *Rpgrip1*, *Rp1*, *CaBP4*, *Pikachurin*, and *Cacna1f* showed drastically decreased expression both in microarray and Q-PCR analysis (Fig. 3).

In contrast, the expression profile of strongly up-regulated genes was grouped into two clusters (Fig. 2B, Table 2). Most of members in the first group (15 genes) were down-regulated in the P12 control retina compared to that of P1. This cluster includes transcription factors *Dlx1*, *Dlx2*, *Sox11* and *Myel1*. These genes are possibly involved in several retinal development events such as proliferation of progenitor cells, maturation of early photoreceptor precursors, and cell fate determination of progenitor cells. Consistent with this result, more probes categorized in “cell cycle” were observed in the up-regulated groups (8% at P1 and 4% at P12) compared to those in the down-regulated groups (2% at both P1 and P12) (Fig. 1). Most of members in the second cluster (22 genes) were up-regulated in the P12 control retina compared to that of P1. This group includes *Car3*, *Spp1*, *Cst7* and *Col12a1*. We suppose that these genes encode components associated with the increase of amacrine-like cells in the *Otx2* CKO retina.

To determine whether up- or down-regulated genes in the *Otx2* CKO retina are indeed enriched for sets of genes expressed selectively in individual retinal cell subtypes, we performed a statistical analysis. We compared our microarray data sets with previously reported cellular expression patterns of each retinal gene obtained from published *in situ* hybridization data [37]. Forty-five of 84 probes corresponding to photoreceptor-specific genes previously identified by *in situ* hybridization analysis were found in the group down-regulated in the *Otx2* CKO retina (1049 probes; signal log ratio  $\leq -1.0$ , signal intensity  $\geq 50$ ). Twenty-one of 70 probes corresponding to amacrine-specific genes previously identified by *in situ* hybridization analysis were found in the group up-regulated in the *Otx2* CKO retina (4149 probes; signal log ratio  $\geq +1.0$ , signal intensity  $\geq 50$ ). This data shows that photoreceptor-specific genes are strongly enriched in the group down-regulated in P12 *Otx2* CKO ( $P < 0.01$ ), whereas, the amacrine-specific genes are enriched in the group up-regulated in the P12 *Otx2* CKO retina ( $P < 0.01$ ).

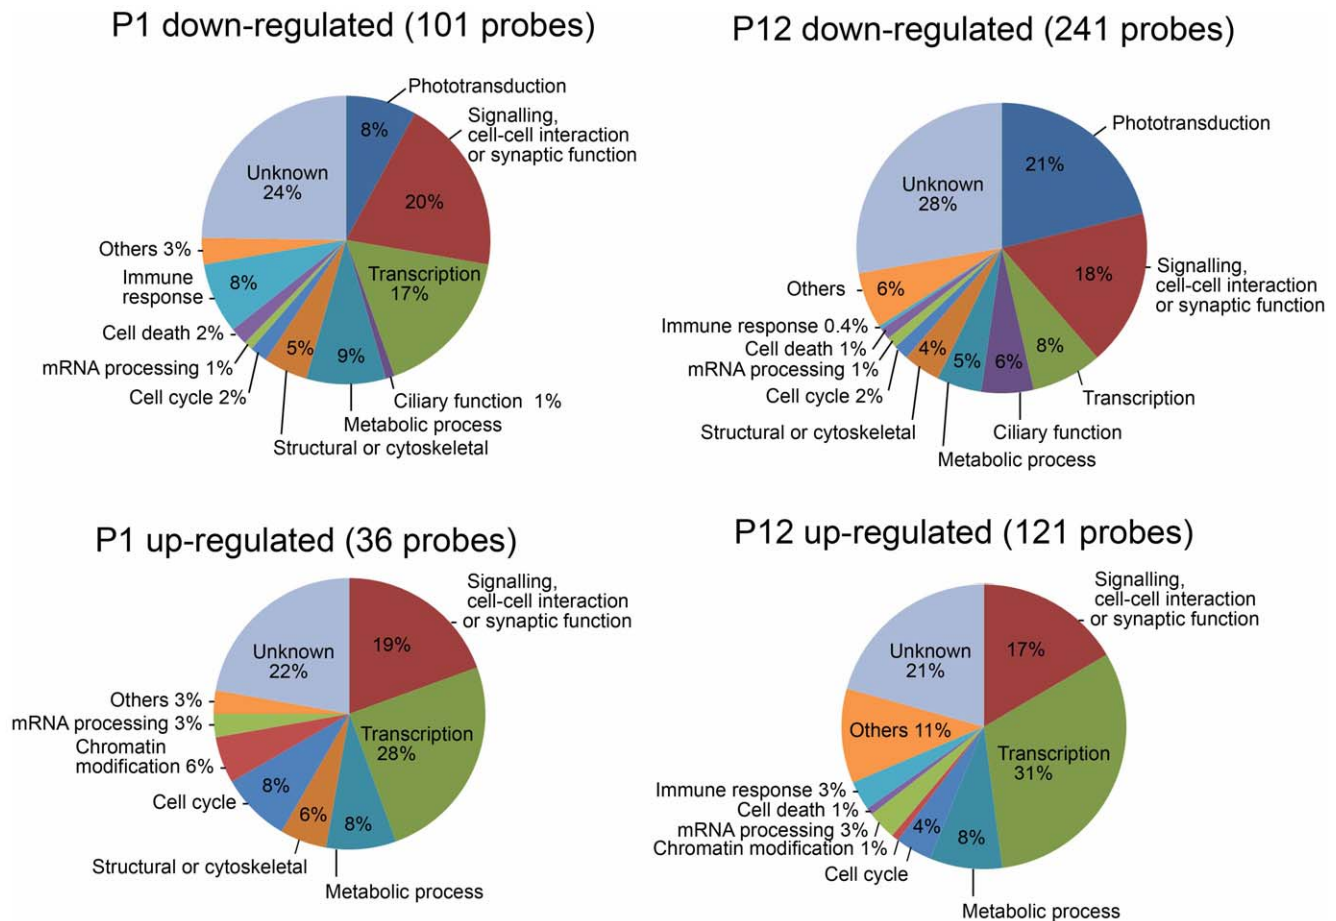

**Figure 1. Categorization of the genes differentially expressed in the *Otx2* CKO retina.** According to gene ontology (GO) term annotation, the genes differentially expressed in the *Otx2* CKO retinas at P1 and P12 were categorized into functional groups. We used GO term data on 101 probes with decreased expression in the *Otx2* CKO at P1 (signal log ratio  $\leq -1.0$ , signal intensity  $\geq 50$ ), 36 probes with increased expression in the *Otx2* CKO at P1 (signal log ratio  $\geq +0.5$ , signal intensity  $\geq 50$ ), 241 probes with decreased expression in the *Otx2* CKO at P12 (signal log ratio  $\leq -2.5$ , signal intensity  $\geq 100$ ), and 121 probes with increased expression in the *Otx2* CKO at P12 (signal log ratio  $\geq +2.5$ , signal intensity  $\geq 100$ ). doi:10.1371/journal.pone.0019685.g001

Furthermore, we compared our microarray data with previously reported cellular expression patterns of each retinal gene obtained from published results of *in situ* hybridization [37,38], immunohistochemistry [39,40], and cell type-specific GFP expression in the retina using BAC transgenic mice from the GENSAT project [41] (Table 1 and 2). In addition, we searched cone- and rod-specific genes based on the microarray data from *Nrl* KO mice [42] (signal log ratio  $\leq -2.0$  for “down” or  $\geq +2.0$  for “up”). Most of the down-regulated genes in P12 *Otx2* CKO were known cone, rod or pan-photoreceptor genes (Table 1), whereas, several genes up-regulated in the *Otx2* CKO retina were known amacrine- or INL-expressed genes. Expression patterns of many genes in the latter group were previously unidentified in the retina (Table 2).

Expression profiles of *Crx*, *Nrl*, and *Nr2e3*-null retinas were reported previously [42,43,44,45]. We compared datasets of the *Otx2* CKO retina with those of the *Crx*, *Nrl*, and *Nr2e3*-null retinas (Fig. 4, Text S1). We found that the expression of 84 probes was strongly decreased in both the *Otx2* CKO and *Crx* KO retinas (signal log ratio  $\leq -2.0$ , Fig. 4A). This group includes both rod and cone photoreceptor genes such as *Rhodopsin* (*Rho*) and *S-opsin* (*Opn1sw*). The expression of 48 probes was markedly decreased in both the *Otx2* CKO and *Nrl* KO retinas (signal log ratio  $\leq -2.0$ , Fig. 4B). These genes include rod-specific genes such as *Pde6b* and *Rho*. We identified 18 probes that were down-regulated in the *Otx2*

CKO retina but up-regulated in the *Nrl* KO retina, including cone photoreceptor genes such as *Opn1sw*, *cone arrestin* (*Arr3*) and *Pde6c* (Fig. 4B). Five of six genes down-regulated in the *Otx2* CKO retina but up-regulated in the *Nr2e3*-null retina overlapped with the probes down-regulated in the *Otx2* CKO and up-regulated in the *Nrl* KO retina (Fig. 4C).

### *Otx2* regulates expression of transcription factors involved in retinal development

To investigate the transcriptional network of *Otx2*-regulated genes, we first focused on the expression of transcription factors involved in retinal development. We previously showed that *Crx* expression was absent in the *Otx2* CKO retina at E18.5, however, the expression of other transcription factors involved in photoreceptor development was not determined [4]. We selected the microarray data sets of 28 transcription factors known to be involved in retinal development (Table 3), and found that the expression of several transcription factor genes (*Crx*, *Nrl*, *Nr2e3*, *Esrrb*, *Isl1*, *Blimp1*, *Pias3* and *NeuroD*) was strongly reduced at P12 (signal log ratio  $\leq -2.1$ ), whereas the expression level of *Pax6* was increased consistent with the previous result by immunohistochemical analysis [4,46] (Table 3). In addition, we found that the expression of *Crx*, *Nrl* and *Nr2e3* was strongly reduced at P1 as well

**Table 1.** Genes down-regulated in the *Otx2* CKO retina (signal log ratio  $\leq -5.0$ ).

| Probe ID     | Gene symbol      | P1 WT | P12 WT | P1 CKO | P12 CKO | SLR  | Cell Type     | Nrl KO |
|--------------|------------------|-------|--------|--------|---------|------|---------------|--------|
| 1430817_at   | Samd7            | 12.4  | 221.6  | 1.9    | 2.0     | -6.8 | Photoreceptor |        |
| 1431010_a_at | Rdh12            | 2.2   | 1411.2 | 0.4    | 19.9    | -6.2 | Photoreceptor |        |
| 1457855_at   | Rbp3             | 8.4   | 190.0  | 1.2    | 2.7     | -6.1 | Photoreceptor |        |
| 1429133_at   | Nxn2             | 48.6  | 1742.8 | 2.4    | 31.3    | -5.8 | Photoreceptor |        |
| 1458506_at   | Gm626/Frmpd2     | 10.8  | 962.8  | 1.7    | 19.1    | -5.7 |               |        |
| 1451785_at   | Rpgrip1          | 27.6  | 653.9  | 3.8    | 13.0    | -5.6 | Photoreceptor |        |
| 1440605_at   | Fscn2            | 0.3   | 128.2  | 1.0    | 2.6     | -5.6 | Rod           | down   |
| 1425757_a_at | Impg1            | 1.6   | 266.2  | 1.5    | 5.4     | -5.6 | Photoreceptor |        |
| 1419740_at   | Pde6b            | 16.4  | 4001.8 | 1.2    | 83.8    | -5.6 | Rod           | down   |
| 1425306_at   | BC027072/C2orf71 | 26.6  | 1241.9 | 2.2    | 26.1    | -5.6 |               |        |
| 1423631_at   | Nr2e3            | 95.0  | 2540.0 | 7.2    | 57.4    | -5.5 | Rod           | down   |
| 1428986_at   | Slc17a7          | 3.0   | 1384.0 | 2.6    | 32.0    | -5.4 | Photoreceptor |        |
| 1444095_a_at | LOC100048701     | 1.2   | 469.3  | 0.5    | 11.4    | -5.4 |               |        |
| 1443940_at   | Lrit2            | 9.9   | 363.7  | 1.7    | 8.9     | -5.4 | Photoreceptor |        |
| 1456936_at   | Cabp4            | 2.8   | 569.7  | 0.8    | 14.1    | -5.3 | Photoreceptor |        |
| 1451582_at   | Tulp1            | 98.3  | 3258.0 | 10.6   | 80.6    | -5.3 | Photoreceptor |        |
| 1452243_at   | Kcnj14           | 1.5   | 708.9  | 0.3    | 17.7    | -5.3 | Rod           | down   |
| 1425288_at   | Samd11           | 67.5  | 1913.3 | 11.4   | 48.2    | -5.3 | Rod           | down   |
| 1451826_at   | Cabp5            | 6.4   | 774.2  | 1.0    | 19.8    | -5.3 | Bipolar       | up     |
| 1419723_at   | Opn1mw           | 0.9   | 847.4  | 2.0    | 22.1    | -5.3 | Cone          |        |
| 1419085_at   | Pcp2             | 13.4  | 2792.9 | 1.5    | 73.6    | -5.2 | Bipolar       |        |
| 1441110_at   | Lrit1            | 14.5  | 1111.4 | 1.4    | 30.3    | -5.2 | Photoreceptor |        |
| 1421084_at   | Rs1              | 1.8   | 755.8  | 0.4    | 20.9    | -5.2 | Photoreceptor |        |
| 1425138_at   | Guca1b           | 4.0   | 1787.6 | 1.0    | 49.8    | -5.2 | Rod           | down   |
| 1451549_at   | Cngb1            | 7.8   | 1634.8 | 2.6    | 45.6    | -5.2 | Rod           | down   |
| 1450300_at   | Gabbr1           | 2.2   | 547.3  | 2.2    | 15.3    | -5.2 | Photoreceptor |        |
| 1449051_at   | Ppara            | 1.0   | 109.9  | 1.3    | 3.1     | -5.2 |               |        |
| 1427952_at   | Aipl1            | 22.8  | 2769.5 | 4.0    | 78.0    | -5.1 | Cone          |        |
| 1451763_at   | Cnga1            | 1.7   | 687.8  | 0.6    | 19.4    | -5.1 | Rod           | down   |
| 1451617_at   | Rho              | 6.8   | 5886.7 | 2.9    | 167.5   | -5.1 | Rod           | down   |
| 1455203_at   | A930003A15Rik    | 11.3  | 1176.5 | 4.3    | 33.9    | -5.1 |               |        |
| 1425408_a_at | 2610034M16Rik    | 0.9   | 117.8  | 0.7    | 3.4     | -5.1 |               | down   |
| 1450453_a_at | Pde6g            | 26.3  | 4870.2 | 5.6    | 140.8   | -5.1 | Rod           |        |
| 1457622_at   | Rp111            | 15.5  | 1055.1 | 2.4    | 30.7    | -5.1 | Rod           |        |
| 1442863_at   | Cacna2d4         | 11.5  | 306.6  | 1.5    | 9.0     | -5.1 | Photoreceptor |        |
| 1460368_at   | Mpp4             | 18.3  | 2727.2 | 3.6    | 80.9    | -5.1 | Photoreceptor |        |
| 1425219_x_at | Gngt1            | 6.2   | 2929.2 | 1.6    | 87.2    | -5.1 | Photoreceptor |        |
| 1451647_at   | Slc24a1          | 1.7   | 1526.9 | 1.5    | 45.5    | -5.1 | Rod           | down   |
| 1448996_at   | Rom1             | 76.8  | 3650.3 | 6.4    | 112.0   | -5.0 | Rod           |        |
| 1449421_a_at | Kcne2            | 3.0   | 452.8  | 0.6    | 14.0    | -5.0 | Cone          | up     |
| 1417550_a_at | Gsg1             | 2.1   | 338.6  | 1.0    | 10.5    | -5.0 |               |        |
| 1449185_at   | Crx              | 159.1 | 2167.9 | 12.3   | 68.2    | -5.0 | Photoreceptor |        |
| 1440256_at   | Rgs9bp           | 6.9   | 691.1  | 1.2    | 21.8    | -5.0 | Photoreceptor |        |
| 1450946_at   | Nrl              | 293.9 | 6073.3 | 18.6   | 191.9   | -5.0 | Rod           | down   |
| 1450415_at   | Pde6a            | 2.0   | 728.5  | 0.7    | 23.2    | -5.0 | Rod           | down   |
| 1422724_at   | Mak              | 18.5  | 429.6  | 1.5    | 13.8    | -5.0 | Photoreceptor |        |

doi:10.1371/journal.pone.0019685.t001

**Table 2.** Genes up-regulated in the *Otx2* CKO retina (signal log ratio  $\geq +3.0$ ).

| Probe Set ID | Gene Symbol   | P1 WT | P12 WT | P1 CKO | P12 CKO | P12/P1 | P12WT/CKO | Cell type    |
|--------------|---------------|-------|--------|--------|---------|--------|-----------|--------------|
| 1449470_at   | Dlx1          | 26.4  | 0.7    | 66.0   | 273.4   | -5.2   | 8.6       | GCL(d)       |
| 1424010_at   | Mfap4         | 23.7  | 1.5    | 10.5   | 102.5   | -4.0   | 6.1       |              |
| 1450960_at   | Igf1bp1       | 13.6  | 10.9   | 26.3   | 445.7   | -0.3   | 5.3       |              |
| 1431225_at   | BC048721      | 339.0 | 42.9   | 826.0  | 1691.1  | -3.0   | 5.3       |              |
| 1424596_s_at | Lmcd1         | 1.5   | 3.0    | 1.4    | 108.6   | 1.0    | 5.2       |              |
| 1450680_at   | Rag1          | 6.3   | 6.0    | 3.0    | 180.6   | -0.1   | 4.9       |              |
| 1429945_at   | Klhl35        | 17.4  | 16.8   | 33.4   | 390.2   | 0.0    | 4.5       |              |
| 1419202_at   | Cst7          | 2.0   | 4.5    | 1.3    | 101.0   | 1.2    | 4.5       |              |
| 1434411_at   | Col12a1       | 0.2   | 10.3   | 0.8    | 220.8   | 5.5    | 4.4       |              |
| 1426604_at   | Rnasel        | 103.1 | 11.9   | 90.2   | 234.4   | -3.1   | 4.3       | PR+INL(B)    |
| 1416846_a_at | Pdzrn3        | 106.1 | 55.7   | 103.4  | 878.1   | -0.9   | 4.0       |              |
| 1439426_x_at | Lyz1          | 50.6  | 11.9   | 18.5   | 182.9   | -2.1   | 3.9       |              |
| 1453125_at   | Sox11         | 344.6 | 60.7   | 255.6  | 845.5   | -2.5   | 3.8       | PR+INL(B)    |
| 1438245_at   | AK034813      | 77.5  | 96.7   | 68.2   | 1295.1  | 0.3    | 3.7       |              |
| 1418139_at   | Dcx           | 116.4 | 59.5   | 106.0  | 797.1   | -1.0   | 3.7       | HC(W)        |
| 1448877_at   | Dlx2          | 17.7  | 9.0    | 36.5   | 119.8   | -1.0   | 3.7       | INL+GCL(d)   |
| 1449434_at   | Car3          | 11.9  | 53.5   | 11.3   | 700.0   | 2.2    | 3.7       | AM(G)        |
| 1449254_at   | Spp1          | 5.3   | 35.8   | 2.0    | 412.2   | 2.7    | 3.5       |              |
| 1428184_at   | 3110035E14Rik | 66.3  | 21.5   | 45.4   | 237.6   | -1.6   | 3.5       |              |
| 1460009_at   | Ier5          | 22.6  | 43.7   | 32.4   | 442.5   | 1.0    | 3.3       | AM+PR+GCL(G) |
| 1436364_x_at | Nfix          | 87.8  | 376.3  | 82.3   | 3784.4  | 2.1    | 3.3       | BP+GCL(G)    |
| 1442214_at   | AK141047      | 59.0  | 63.3   | 44.6   | 635.9   | 0.1    | 3.3       |              |
| 1437156_at   | Necab1        | 4.0   | 26.5   | 3.6    | 264.5   | 2.7    | 3.3       |              |
| 1456261_at   | Sh3kbp1       | 5.4   | 11.4   | 4.8    | 109.2   | 1.1    | 3.3       |              |
| 1448891_at   | Fcrls         | 3.9   | 12.9   | 6.0    | 122.4   | 1.7    | 3.2       |              |
| 1434777_at   | Mycl1         | 108.0 | 28.2   | 100.9  | 264.9   | -1.9   | 3.2       |              |
| 1435165_at   | Cntn2         | 9.0   | 20.5   | 25.9   | 186.8   | 1.2    | 3.2       |              |
| 1416034_at   | Cd24a         | 580.5 | 176.8  | 592.6  | 1602.4  | -1.7   | 3.2       | MG(B)        |
| 1449130_at   | Cd1d1         | 150.3 | 40.8   | 116.0  | 367.1   | -1.9   | 3.2       |              |
| 1447020_at   | AK042819      | 2.8   | 11.6   | 2.5    | 103.1   | 2.1    | 3.1       |              |
| 1438072_at   | AK042460      | 63.3  | 77.1   | 45.6   | 662.9   | 0.3    | 3.1       |              |
| 1453326_at   | 3300001A09Rik | 26.3  | 13.0   | 6.7    | 110.5   | -1.0   | 3.1       |              |
| 1457261_at   | A930025H08Rik | 4.5   | 12.0   | 4.9    | 100.6   | 1.4    | 3.1       |              |
| 1439808_at   | A130090K04Rik | 19.1  | 24.6   | 28.9   | 204.9   | 0.4    | 3.1       |              |
| 1448288_at   | Nfib          | 33.4  | 41.4   | 24.3   | 333.9   | 0.3    | 3.0       |              |
| 1448194_a_at | H19           | 191.6 | 47.4   | 188.1  | 379.1   | -2.0   | 3.0       |              |
| 1457227_at   | AI843755      | 8.9   | 26.3   | 7.2    | 207.1   | 1.6    | 3.0       |              |

PR, photoreceptor cell; AM, amacrine cell; BP, bipolar cell; MG, Müller glia; GCL, cells in ganglion cell layer; HC, horizontal cell; INL, cells in inner nuclear layer. d, de Melo et al., 2003; W, Wakabayashi et al., 2008; B, Blackshaw et al., 2004; G, GENSAT database. doi:10.1371/journal.pone.0019685.t002

(signal log ratio  $\leq -3.7$ , Table 3). To validate these microarray results, we carried out quantitative real-time RT-PCR analysis (Q-PCR) for these genes. The Q-PCR results clearly reflect the changes observed in the microarray analysis for all of the genes we tested (Fig. 5).

To compare expression of the transcription factor genes examined with those in the *Crx* KO retina, we analyzed their expression level in the P12 *Crx* KO retina by Q-PCR. In contrast to the drastic decrease of expression in the *Otx2* CKO retina, the expression of most of the transcription factors examined showed only a minor change in the *Crx* KO retina at P12 compared to that

of the control retina from wild-type *129/SvEv*. The only notable exception was *Esr1b* which was strongly down-regulated in the *Crx* KO (Fig. 5) [43]. Similar to these transcription factors, we found that the expression changes in genes encoding ciliary and ribbon synaptic components in the *Crx* KO retina were milder than those in the *Otx2* CKO retina (Fig. 3).

#### Identification of retinal disease candidate genes

Human homolog mutations of many genes with photoreceptor-associated expression have been shown to be associated with retinal diseases including RP [27]. Since many of the *Otx2* CKO

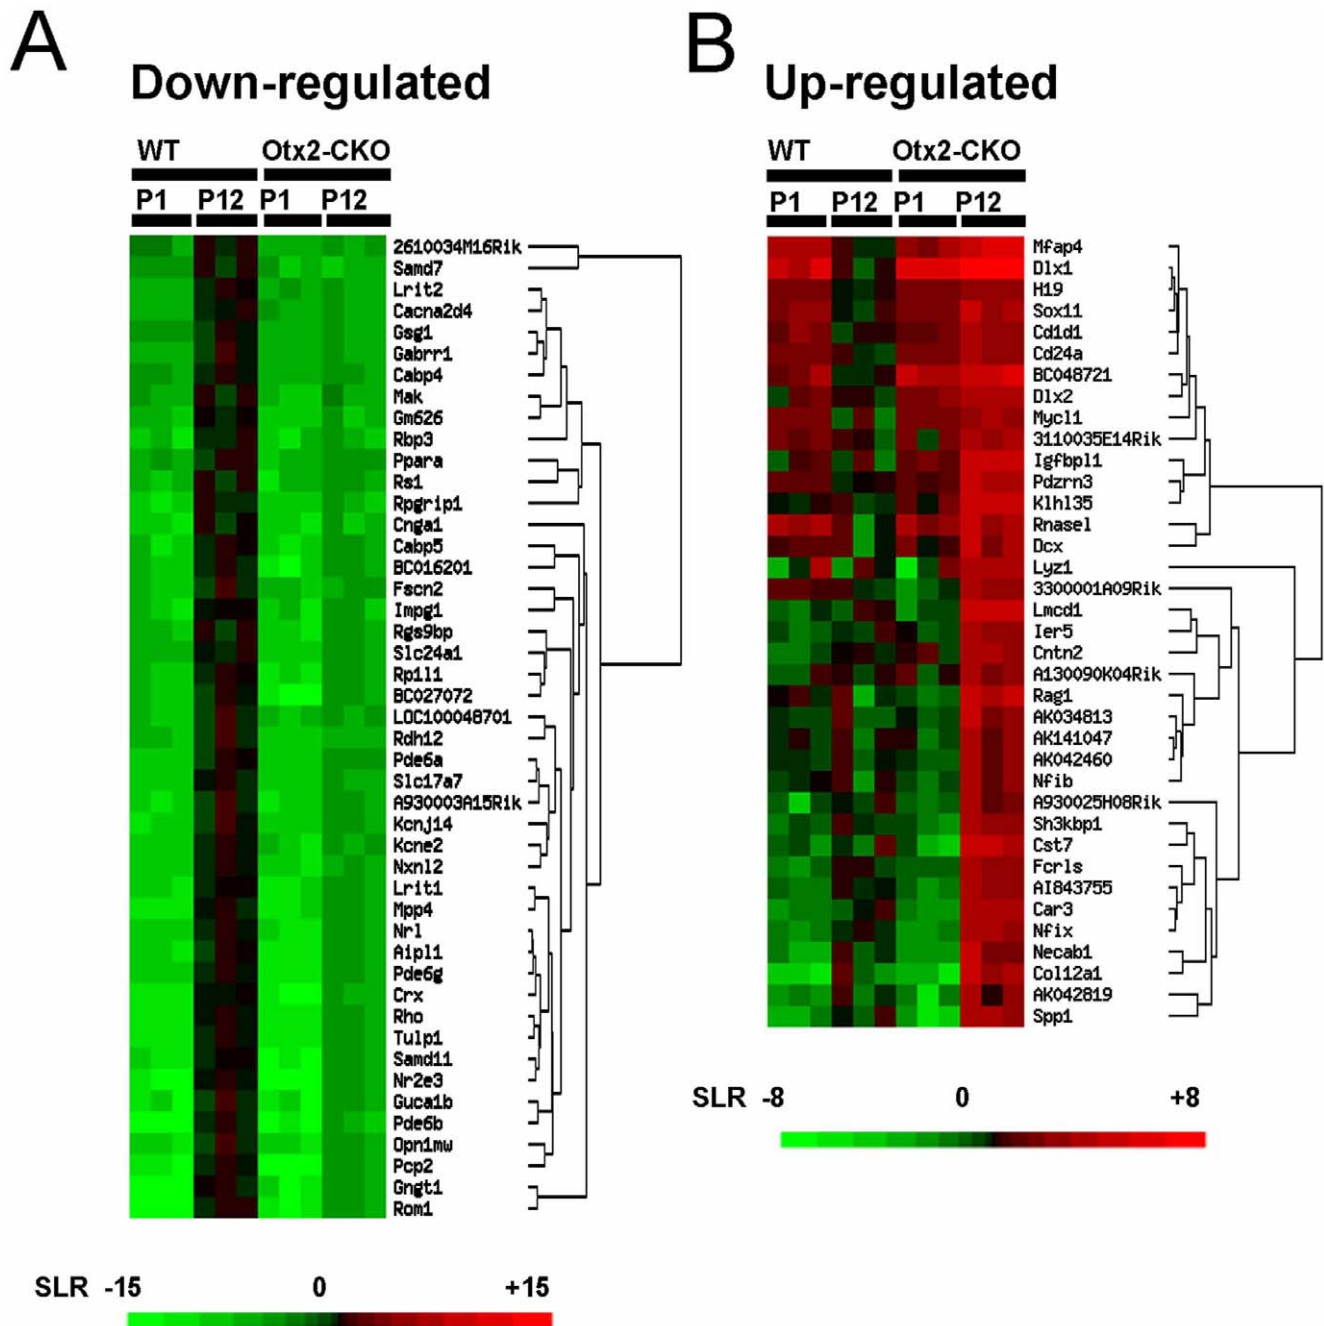

**Figure 2. Clustering analysis of retinal gene expression profiles in the *Otx2* CKO and control retinas.** (A, B) Matrices were visualized as hierarchical clustering of down-regulated (A) and up-regulated (B) genes in the *Otx2* CKO retina at P1 and P12. Each gene was visualized as a single row of colored squares. The color indicates the relative expression level of a gene. Signal log ratio (SLR) was calculated based on the average of signal intensity of the control retina at P12. The color scale ranges are from signal log ratios of  $-15$  to  $+15$  (A) and  $-8$  to  $+8$  (B) as shown in the scale bar on the bottom of the figure. Gene symbols are indicated in the lists on the right of the matrixes. Hierarchical clustering was performed by the EPCLUST program (<http://www.bioinf.ebc.ee/EP/EPCLUST/>). doi:10.1371/journal.pone.0019685.g002

down-regulated genes at P12 were photoreceptor-associated genes (Table 1), we supposed that mutations of human homologs of these down-regulated genes may be responsible for retinal degeneration diseases. To identify retinal disease candidate genes, we determined the chromosomal loci of human homologs of these down-regulated genes and compared these loci with the mapped loci of various hereditary retinal diseases (RetNet, the Retinal Information Network, <http://www.sph.uth.tmc.edu/RetNet/>). We found

that three human retinal disease loci were mapped in close proximity to the markedly down-regulated genes in the *Otx2* CKO retina. Human *CCDC126* is located on 7p15.3 where dominant cystoid macular dystrophy has been mapped [47]. Human *PITPNM1* is located on 11q13 where autosomal dominant neovascular inflammatory vitreoretinopathy was reported [48].

Central areolar choroidal dystrophy was confined to a critical region, an interval of approximately 2.4 Mb (5 cM) flanked by

### Rpgrip1

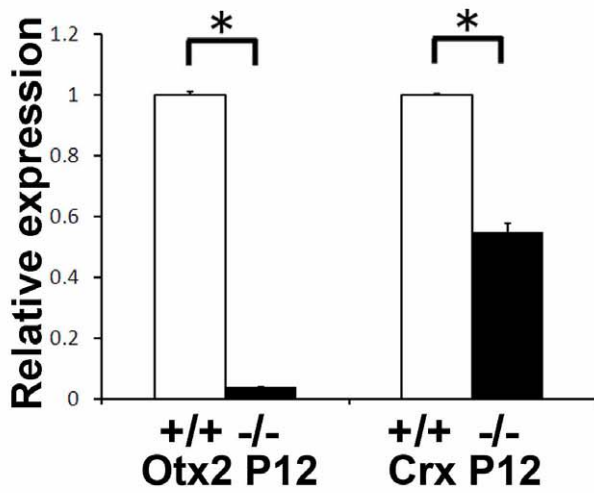

### Rp1

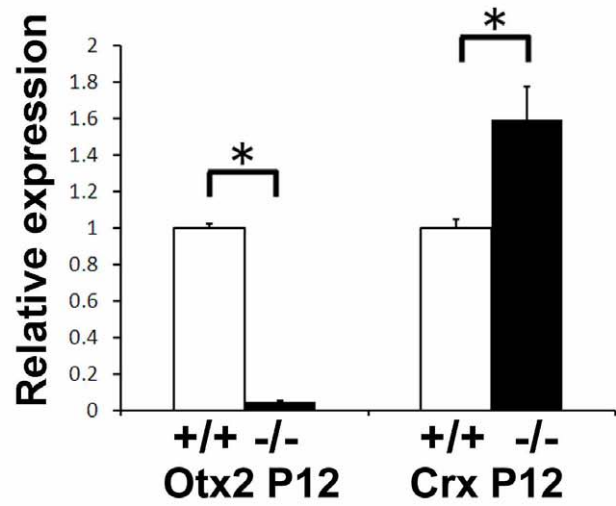

### Cabp4

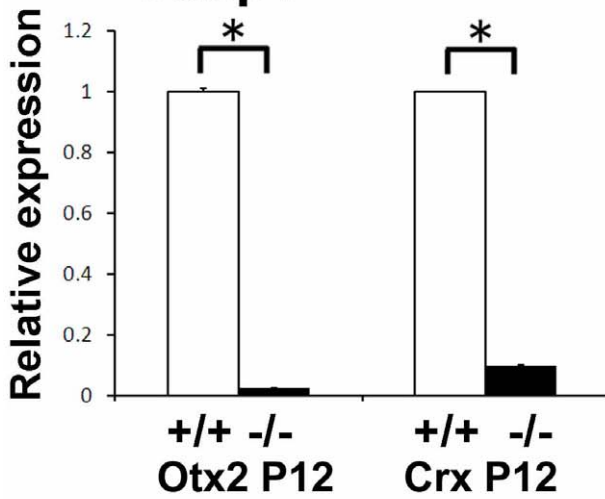

### Pikachurin

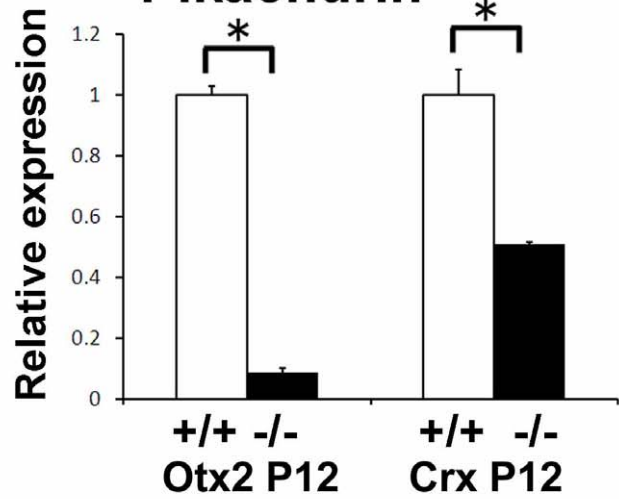

### Cacna1f

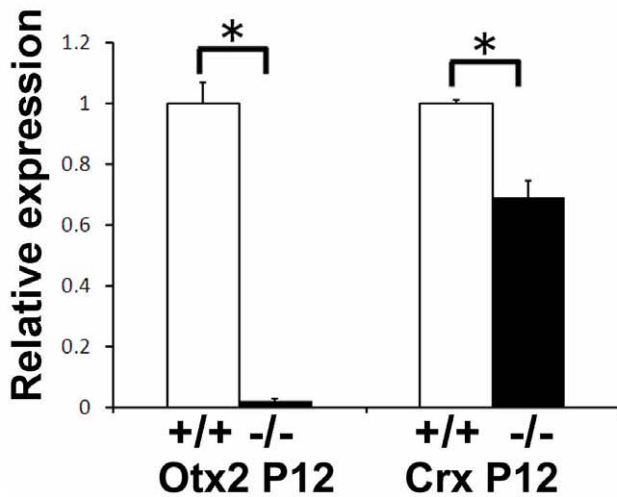

**Figure 3. Expression of genes encoding photoreceptor ciliary and ribbon synaptic components in the *Otx2* CKO and *Crx* KO retina.** Expression levels of genes encoding photoreceptor ciliary and ribbon synaptic components in the control, *Otx2* CKO and *Crx* KO retinas at P12 were analyzed by Q-PCR. Expression levels of selected genes were normalized to the expression levels of a housekeeping gene, *Gapdh*. Primer sequences for PCR were shown in Table S1. The mean of the value of control at P12 was set as 1.0. Error bars show the SD (n=3). \*, P<0.03. doi:10.1371/journal.pone.0019685.g003

polymorphic markers *D17S1810* and *CHLC GATA7B03* on chromosome 17p13 [49]. Human *TNFSF13* is located between these intervals. The photoreceptor-enriched expression pattern and genomic localization of *Tnfsf13* have been previously reported

[37,38]. *Ccdc126*, *Tnfsf13* and *Pitpnm1* were strongly down-regulated in the *Otx2*-CKO retina, showing signal log ratios of -3.5, -3.0 and -2.4, respectively. We confirmed the decreased expression of these genes in the *Otx2*-null retina by Q-PCR analysis (Fig. 6).

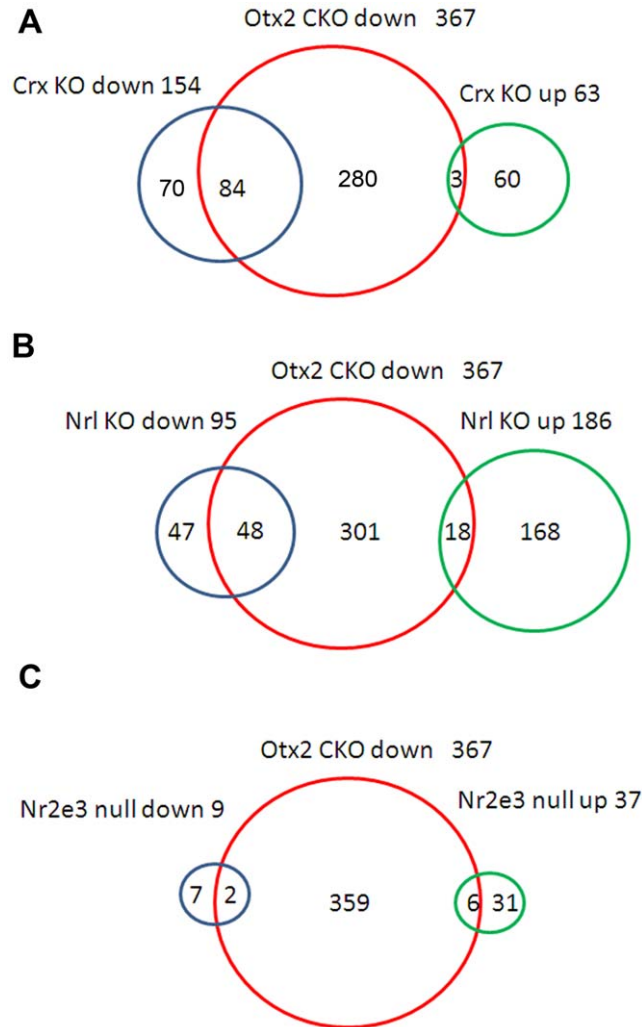

**Figure 4. Comparison gene expression profiles with the *Otx2*-CKO retina.** (A-C) Microarray analysis datasets from *Crx* (A), *Nrl* (B), *Nr2e3* (C) KO retinas were compared with that from the *Otx2* CKO retina at P12. We identified 367 down-regulated probes in the *Otx2* CKO retina (signal log ratio  $\leq -2.0$ , signal intensity  $\geq 74$ ). We used datasets from previous microarray analysis of the *Crx*, *Nrl* and *Nr2e3*-null retinas at P21 with the following results: 154 probes down-regulated in the *Crx* KO retina (signal log ratio  $\leq -2.0$ , signal intensity  $\geq 352$ ), 63 probes up-regulated in the *Crx* KO retina (signal log ratio  $\geq +2.0$ , signal intensity  $\geq 345$ ), 95 probes down-regulated in the *Nrl* KO retina (signal log ratio  $\leq -2.0$ , signal intensity  $\geq 354$ ), 186 probes up-regulated in the *Nrl* KO retina (signal log ratio  $\geq +2.0$ , signal intensity  $\geq 347$ ), 9 probes down-regulated in the *Nr2e3*-null (rd7) retina (signal log ratio  $\leq -2.0$ , signal intensity  $\geq 354$ ), 37 probes up-regulated in the *Nr2e3*-null retina (signal log ratio  $\geq +2.0$ , signal intensity  $\geq 358$ ). The numbers of probes in each category were indicated. doi:10.1371/journal.pone.0019685.g004

**Discussion**

***Otx2* regulates the transcriptional network in photoreceptor development**

The main goal of this study is to obtain information and gain insights into the transcriptional network in photoreceptor development regulated by *Otx2*. Thus, we examined the retinal gene expression profiles of the *Otx2* CKO retina at P1 and P12, and identified significant changes in the expression of genes encoding transcription factors, components of the cilium and

**Table 3. Expression of transcription factors involved in retinal development in the *Otx2* CKO retina.**

| Probe ID   | Gene symbol  | P1 WT | P1 CKO | SLR  | P12 WT | P12 CKO | SLR  |
|------------|--------------|-------|--------|------|--------|---------|------|
| 1418705_at | Crx          | 253.7 | 15.6   | -4.0 | 2932.7 | 65.3    | -5.5 |
| 1423631_at | Nr2e3        | 95.0  | 7.2    | -3.7 | 2540.0 | 57.4    | -5.5 |
| 1450946_at | Nrl          | 293.9 | 18.6   | -4.0 | 6073.3 | 191.9   | -5.0 |
| 1436926_at | Esrrb        | 5.1   | 3.3    | -0.6 | 632.0  | 24.3    | -4.7 |
| 1450723_at | Isl1         | 196.5 | 219.1  | 0.2  | 1542.2 | 243.0   | -2.7 |
| 1420425_at | Prdm1/Blimp1 | 202.4 | 23.0   | -3.1 | 188.5  | 34.4    | -2.5 |
| 1426413_at | NeuroD       | 296.1 | 96.7   | -1.6 | 1817.2 | 333.7   | -2.4 |
| 1451115_at | Pias3        | 59.1  | 24.7   | -1.3 | 860.0  | 199.7   | -2.1 |
| 1419628_at | Chx10        | 423.7 | 411.8  | 0.0  | 2082.0 | 927.8   | -1.2 |
| 1424034_at | Rora         | 49.2  | 33.8   | -0.5 | 411.0  | 291.4   | -0.5 |
| 1418558_at | Rax          | 168.4 | 117.3  | -0.5 | 309.0  | 222.1   | -0.5 |
| 1418782_at | Rxrg         | 24.7  | 17.3   | -0.5 | 41.1   | 32.7    | -0.3 |
| 1422202_at | Thrb         | 4.8   | 2.6    | -0.9 | 40.9   | 34.0    | -0.3 |
| 1450796_at | Math5        | 32.8  | 21.4   | -0.6 | 3.2    | 3.1     | 0.0  |
| 1455799_at | Rorb         | 465.0 | 387.2  | -0.3 | 747.8  | 765.4   | 0.0  |
| 1418102_at | Hes1         | 111.4 | 94.5   | -0.2 | 90.1   | 140.0   | 0.6  |
| 1437588_at | Brn3b/Pou4F2 | 96.1  | 123.3  | 0.4  | 155.9  | 284.4   | 0.9  |
| 1427523_at | Six3         | 190.5 | 181.7  | -0.1 | 299.7  | 568.2   | 0.9  |
| 1421336_at | Prox1        | 18.6  | 22.8   | 0.3  | 199.1  | 414.2   | 1.1  |
| 1419408_at | Six6         | 237.1 | 238.1  | 0.0  | 335.8  | 774.0   | 1.2  |
| 1418633_at | Notch        | 63.7  | 61.7   | 0.0  | 57.4   | 141.2   | 1.3  |
| 1418054_at | Math3        | 165.5 | 47.0   | -1.8 | 504.4  | 1277.6  | 1.3  |
| 1419271_at | Pax6         | 723.9 | 723.6  | 0.0  | 1042.4 | 3083.1  | 1.6  |
| 1423146_at | Hes5         | 145.0 | 155.6  | 0.1  | 46.7   | 157.4   | 1.8  |
| 1422839_at | Neurog2      | 216.2 | 277.0  | 0.4  | 48.4   | 296.6   | 2.6  |
| 1437086_at | Mash1        | 392.6 | 266.4  | -0.6 | 15.9   | 119.4   | 2.9  |
| 1448877_at | Dlx2         | 17.7  | 36.5   | 1.0  | 9.0    | 119.8   | 3.7  |
| 1449470_at | Dlx1         | 26.4  | 66.0   | 1.3  | 0.7    | 273.4   | 8.6  |

doi:10.1371/journal.pone.0019685.t003



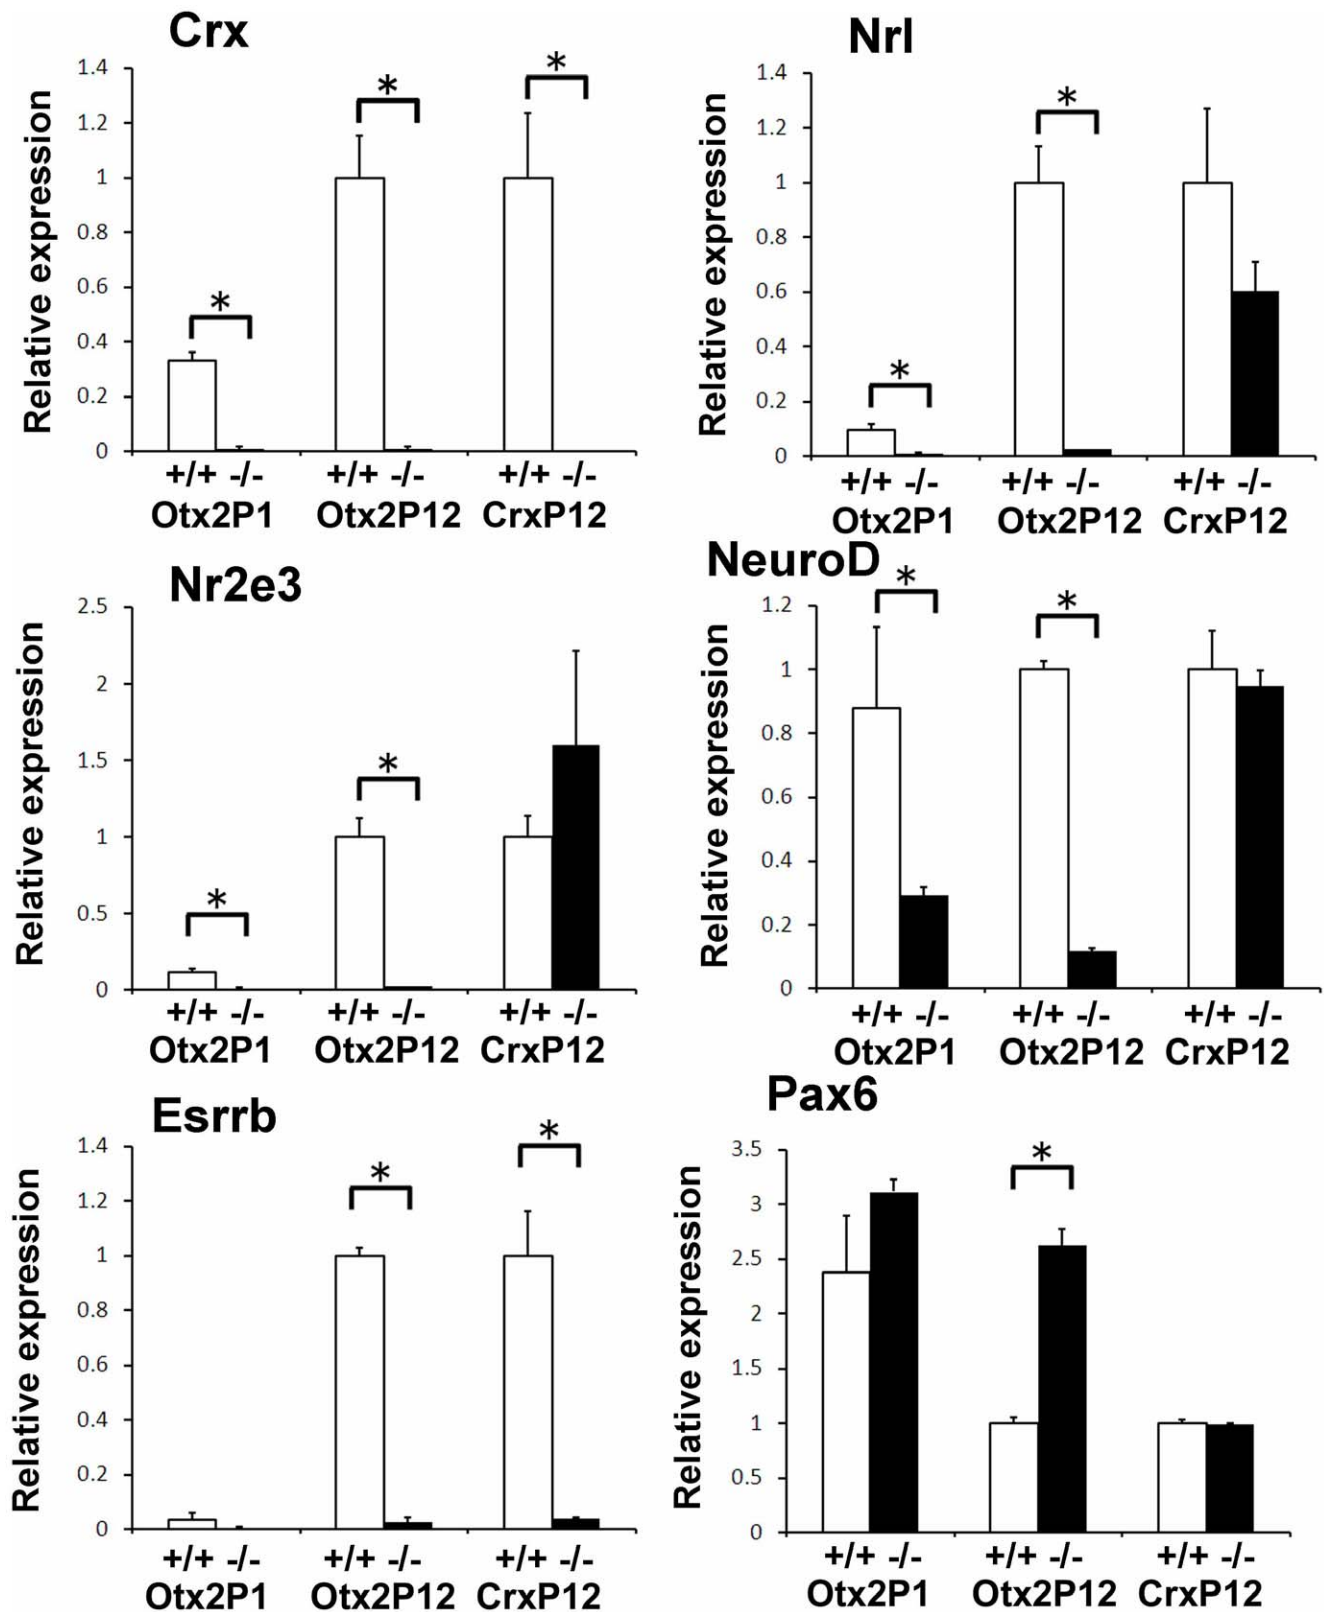

**Figure 5. *Otx2* regulates expression of transcription factors involved in retinal development.** Expression levels of selected transcription factor genes in the control (at P1 and P12), *Otx2* CKO (at P1 and P12) and *Crx* KO (at P12) retinas were analyzed by Q-PCR. Expression levels of selected genes were normalized to the expression levels of a housekeeping gene, *Gapdh*. The mean of the value of each control at P12 was set as 1.0. Error bars show the SD (n = 3). \*, P < 0.03. doi:10.1371/journal.pone.0019685.g005

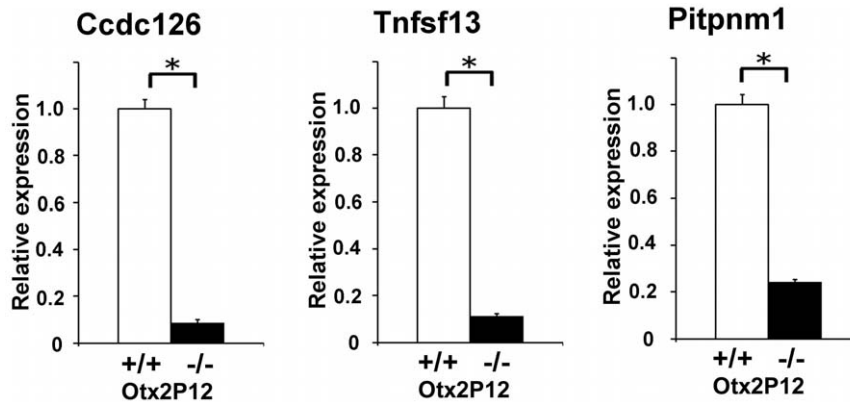

**Figure 6. Expression of identified candidate genes for human retinal diseases in the *Otx2* CKO retina.** Expression of identified candidate genes for human retinal diseases was analyzed by Q-PCR. Expression levels of selected genes were normalized to the expression levels of a housekeeping gene, *Gapdh*. The mean of the value of control at P12 was set as 1.0. Error bars show the SD (n = 3). \*, P<0.03. doi:10.1371/journal.pone.0019685.g006

ribbon synapse. Our microarray analysis and Q-PCR validation of the *Otx2* CKO retina revealed strong down-regulation of multiple transcription factors involved in photoreceptor development, including *Crx*, *Nrl*, *Esrrb*, *NeuroD*, *Isl1*, *Blimp1*, *Pias3* and *Nr2e3*. These data support the hypothesis that *Otx2* organizes a transcription factor network in photoreceptor development. A previous study showed that a considerable amount of *Nrl* expression remains in the *Crx* KO retina, and, similarly, *Crx* expression remains in the *Nrl* KO retinas [43,44], suggesting that *Otx2* regulates the expression of *Nrl* and *Crx* by parallel pathways. *Otx2* directly regulates *Crx* expression through binding to cis-regulatory elements on the *Crx* promoter region [4]. Does *Otx2* directly regulate other transcription factors involved in photoreceptor development? The 2.4 kb fragment in the 5' region of the *Nrl* locus is essential for its expression in photoreceptors and contains *Crx*/*Otx2* binding sites [43]. Since *Otx2* and *Crx* can bind to the same DNA consensus sequence [5,50], it is possible that *Otx2* binds to these cis-regulatory elements and directly regulates *Nrl* expression. In contrast, we found that *Esrrb* expression is almost abolished in both the *Otx2* CKO and the *Crx* KO retinas, showing that *Esrrb* is likely to be regulated directly by *Crx* and indirectly by *Otx2*. Similarly, *Nr2e3* expression in the *Nrl* KO was almost abolished [12], suggesting that *Nr2e3* expression is directly regulated by *Nrl* and indirectly regulated by *Otx2*. We found that expression of *Isl1*, *NeuroD*, *Blimp1*, and *Pias3* was markedly decreased in the P12 *Otx2* CKO retina, however, considerable amounts of expression remained in the *Nrl* KO and *Crx* KO retinas [43]. This result suggests that *Isl1*, *NeuroD*, *Blimp1*, and *Pias3* are the direct targets of *Otx2*. We searched for the *Otx2*/*Crx*-binding consensus sequence “TAATC” within 5 kb of the 5' upstream region of each gene, and found that each of the 5' regions of *Isl1*, *NeuroD* and *Pias3* genes contains clusters of the *Otx2*/*Crx*-binding sequence (−2.3 to −2.7 kb, 5 sites for *Isl1*; −4.2 to −4.9 kb, 4 sites for *NeuroD*; and −1.3 to −2.0 kb, 4 sites for *Pias3*). *Otx2* may directly regulate expression of these transcription factors through these *Otx2*/*Crx*-binding sequence clusters. In contrast to the down-regulation of transcription factors involved in photoreceptor development, we observed a 3.0-fold increase of *Pax6* expression in the P12 *Otx2* CKO retina. This is probably due to the increase of the amacrine cell population, since amacrine cell markers including *Glyt1* and *Gad65* also increased in the *Otx2* CKO at a similar level (3.0-fold increase for *Glyt1*, 3.5-fold increase for *Gad65*). The result from microarray analysis is

consistent with that from immunohistochemical analysis of the *Otx2* CKO retina [4].

We found that photoreceptor-specific genes are strongly enriched in the group of down-regulated probes in the P12 *Otx2* CKO retina, whereas amacrine-specific genes are enriched in the group of up-regulated probes in the P12 *Otx2* CKO retina. Although many of down-regulated genes in the P12 *Otx2* CKO retina were known photoreceptor genes, the expression patterns of several genes, including BC027072/C2orf71, LOC100048701, A930003A15Rik, and 2610034M16Rik, have not been analyzed in the retina. These genes are strong candidates for photoreceptor-specific genes. Expression of 2610034M16Rik was decreased in the *Nrl* KO retina, suggesting that this gene is expressed in rod photoreceptors. In contrast to the high enrichment of photoreceptor genes in the *Otx2* down-regulated probes, amacrine genes were enriched in the group up-regulated in the *Otx2* CKO retina. This group seems to contain not only amacrine associated genes but also various genes from cell types including Muller glia and cells in ganglion cell layer. This result may reflect the increase of aberrant “amacrine-like cells” in the *Otx2* CKO retina.

We found that genes encoding synaptic components (e.g. *CaBP4*, *Caen1f* and *Pikachurin*) and ciliary components (e.g. *Rpgrip1* and *Rpl1*) were also significantly downregulated in the *Otx2* CKO retina. We previously demonstrated that rhodopsin- and Crx-positive cells were absent in the *Otx2* CKO retina [4], however, there is a possibility that the increased amacrine-like cells converted from photoreceptors in the *Otx2* CKO retina still express photoreceptor-related molecules. Our findings in the present study excluded this possibility and support the idea that *Otx2* executes a genetic program on photoreceptor cell fate determination and differentiation. Thus, the transcriptional profile data in this study will be a useful resource to identify genes involved in development and maintenance of both rods and cones.

Previously, we showed that *Otx2* is essential for bipolar cell development [51]. Consistent with this, we observed significant decreases in bipolar genes, including *Bhlhb4*, *Chx10*, *Cabp5* and *Pcp2*, in the *Otx2* CKO retina.

The morphological features of rod and cone photoreceptor ribbon synaptic terminals are different; rod photoreceptors form small synaptic terminals with a single ribbon, whereas, cone photoreceptors form larger terminals containing several ribbons with a shorter active zone [24]. These structural differences might be derived from differences of synaptic components. Transcription

factors involved in photoreceptor terminal differentiation such as *Nrl* and *Nr2e3* may regulate the expression of rod- or cone-specific synaptic components and contribute to the formation of different structures between cone and rod photoreceptors. Compared with the previous microarray studies, we identified 48 down-regulated probes in both the *Otx2* CKO and *Nrl* KO retinas, while at the same time, 18 probes were down-regulated in the *Otx2* CKO but up-regulated in the *Nrl* KO retina. These data can be a useful resource for finding different mechanisms between cone and rod photoreceptor formation, including ribbon synapse structures.

### Identification of retinal disease candidate genes from *Otx2* downstream genes

The expression profiles of several transcription factors which were shown to be critical for photoreceptor terminal differentiation have been analyzed by microarray or SAGE analysis. The expression profile of the *Crx* KO retina was analyzed using both cDNA microarray and SAGE [38,43,52]. Analyses of the expression profiles of *Nrl* KO, *Nr2e3* KO or *Nrl* & *Nr2e3* double KO retinas were performed using microarrays [42,43,44,45]. Lack of *Crx* does not affect photoreceptor cell fate but does result in abnormal photoreceptor morphogenesis [7]. Lack of either *Nrl* or *Nr2e3* causes photoreceptor subtype conversion from rod photoreceptor to S-cone photoreceptors [12,14]. Since deletion of *Otx2* leads to a total loss of photoreceptors in the retina, by comparing expression profiles between the *Otx2* CKO retina and control retina, we were able to identify photoreceptor-associated genes more clearly than by using other mutant retinas. Comparing the expression profiles between the *Otx2* CKO and other mutant mice may provide novel insight into genetic transcriptional networks in photoreceptor development. Furthermore, we identified several retinal disease candidate genes among the genes down-regulated in the *Otx2* CKO retina based on information from RetNet's mapped retinal disease loci. Linking information from other databases to the set of *Otx2* down-regulated genes presented in our study may give unexpected insights into photoreceptor biology. For example, proteome analysis of purified photoreceptor sensory cilium revealed that this complex contains 1,968 proteins [53]. By comparing our data and the data from other studies, a novel insight on the mechanisms of retinal disease might be obtained in the future.

## Materials and Methods

### Animals

The *Otx2* CKO and *Crx* KO mice were generated in our previous studies [4,7]. All procedures conformed to the ARVO statement for the Use of Animals in Ophthalmic and Vision

## References

- Masland RH (2001) The fundamental plan of the retina. *Nat Neurosci* 4: 877–886.
- Turner DL, Cepko CL (1987) A common progenitor for neurons and glia persists in rat retina late in development. *Nature* 328: 131–136.
- Wetts R, Fraser SE (1988) Multipotent precursors can give rise to all major cell types of the frog retina. *Science* 239: 1142–1145.
- Nishida A, Furukawa A, Koike C, Tano Y, Aizawa S, et al. (2003) *Otx2* homeobox gene controls retinal photoreceptor cell fate and pineal gland development. *Nat Neurosci* 6: 1255–1263.
- Furukawa T, Morrow EM, Cepko CL (1997) *Crx*, a novel *otx*-like homeobox gene, shows photoreceptor-specific expression and regulates photoreceptor differentiation. *Cell* 91: 531–541.
- Freund CL, Gregory-Evans CY, Furukawa T, Papaioannou M, Looser J, et al. (1997) Cone-rod dystrophy due to mutations in a novel photoreceptor-specific homeobox gene (*CRX*) essential for maintenance of the photoreceptor. *Cell* 91: 543–553.
- Furukawa T, Morrow EM, Li T, Davis FC, Cepko CL (1999) Retinopathy and attenuated circadian entrainment in *Crx*-deficient mice. *Nat Genet* 23: 466–470.
- Swain PK, Chen S, Wang QL, Affatigato LM, Coats CL, et al. (1997) Mutations in the cone-rod homeobox gene are associated with the cone-rod dystrophy photoreceptor degeneration. *Neuron* 19: 1329–1336.
- Sohocki MM, Sullivan LS, Mintz-Hittner HA, Birch D, Heckenlively JR, et al. (1998) A range of clinical phenotypes associated with mutations in *CRX*, a photoreceptor transcription-factor gene. *Am J Hum Genet* 63: 1307–1315.
- Freund CL, Wang QL, Chen S, Muskat BL, Wiles CD, et al. (1998) De novo mutations in the *CRX* homeobox gene associated with Leber congenital amaurosis. *Nat Genet* 18: 311–312.
- Swaroop A, Xu JZ, Pawar H, Jackson A, Skolnick C, et al. (1992) A conserved retina-specific gene encodes a basic motif/leucine zipper domain. *Proc Natl Acad Sci U S A* 89: 266–270.
- Mears AJ, Kondo M, Swain PK, Takada Y, Bush RA, et al. (2001) *Nrl* is required for rod photoreceptor development. *Nat Genet* 29: 447–452.

Research, and these procedures were approved by the Institutional Safety Committee on Recombinant DNA Experiments and the Animal Research Committee of Osaka Bioscience Institute (approval ID 10-401). Mice were housed in a temperature-controlled room with a 12 h light/dark cycle. Fresh water and rodent diet were available at all times.

### Microarray profiling

The P1 or P12 retinas of mouse were dissected. Total RNA (5 µg) of the retina was isolated using TRIzol reagent (Invitrogen) and converted to cDNA using One-Cycle cDNA synthesis kit (Affymetrix) according to the manufacture's instruction. Biotin-labeled cRNA was prepared using IVT labeling kit and hybridized to GeneChip mouse genome 430 2.0 array (Affymetrix). Signal intensity was determined using GeneChip Operating Software 1.4. Microarray expression data are MIAME compliant and have been deposited in a MIAME compliant database (GEO accession number GSE21900).

### Q-PCR

The P1 or P12 retinas of mouse were dissected. Total RNA (1 µg) of the retina was isolated using TRIzol reagent (Invitrogen) and converted to cDNA using Superscript II RTase (Invitrogen). Real time qPCR was performed using Cyber Green ER qPCR Super MIX (Invitrogen) and Thermal Cycler Dice Real Time System single MRQ TP870 (Takara) according to the manufacture's instruction. Quantification was performed by Thermal Cycler Dice Real Time System software Ver. 2.0 (Takara). To amplify the gene fragments, we used primers as listed in Table S1.

## Supporting Information

**Table S1** Primers for Q-PCR analysis. (XLS)

**Text S1** Probe IDs and gene symbols for each group in Figure 4. (DOC)

## Acknowledgments

We thank M. Kadowaki, M. Joukan, A. Tani, T. Tsujii, A. Ishimaru, Y. Saioka, K. Sone and S. Kennedy for technical assistance.

## Author Contributions

Conceived and designed the experiments: T. Furukawa. Performed the experiments: YO KK SS YM TC AO TM. Analyzed the data: YO KK SS T. Furukawa. Wrote the paper: YO T. Furukawa. Supervised the experiments: T. Fujikado T. Furukawa.

13. Haider NB, Jacobson SG, Cideciyan AV, Swiderski R, Streb LM, et al. (2000) Mutation of a nuclear receptor gene, NR2E3, causes enhanced S cone syndrome, a disorder of retinal cell fate. *Nat Genet* 24: 127–131.
14. Haider NB, Naggert JK, Nishina PM (2001) Excess cone cell proliferation due to lack of a functional NR2E3 causes retinal dysplasia and degeneration in rd7/rd7 mice. *Hum Mol Genet* 10: 1619–1626.
15. Jia L, Oh EC, Ng L, Srinivas M, Brooks M, et al. (2009) Retinoid-related orphan nuclear receptor RORbeta is an early-acting factor in rod photoreceptor development. *Proc Natl Acad Sci U S A* 106: 17534–17539.
16. Ng L, Hurley JB, Dierks B, Srinivas M, Salto C, et al. (2001) A thyroid hormone receptor that is required for the development of green cone photoreceptors. *Nat Genet* 27: 94–98.
17. Roberts MR, Hendrickson A, McGuire CR, Reh TA (2005) Retinoid X receptor (gamma) is necessary to establish the S-opsin gradient in cone photoreceptors of the developing mouse retina. *Invest Ophthalmol Vis Sci* 46: 2897–2904.
18. Fujieda H, Bremner R, Mears AJ, Sasaki H (2009) Retinoic acid receptor-related orphan receptor alpha regulates a subset of cone genes during mouse retinal development. *J Neurochem* 108: 91–101.
19. Onishi A, Peng GH, Poth EM, Lee DA, Chen J, et al. (2010) The orphan nuclear hormone receptor ERRbeta controls rod photoreceptor survival. *Proc Natl Acad Sci U S A* 107: 11579–11584.
20. Onishi A, Peng GH, Hsu C, Alexis U, Chen S, et al. (2009) Pias3-dependent SUMOylation directs rod photoreceptor development. *Neuron* 61: 234–246.
21. Onishi A, Peng GH, Chen S, Blackshaw S (2010) Pias3-dependent SUMOylation controls mammalian cone photoreceptor differentiation. *Nat Neurosci* 13: 1059–1065.
22. Sterling P, Matthews G (2005) Structure and function of ribbon synapses. *Trends Neurosci* 28: 20–29.
23. Dick O, tom Dieck S, Altmann WD, Ammermuller J, Weiler R, et al. (2003) The presynaptic active zone protein bassoon is essential for photoreceptor ribbon synapse formation in the retina. *Neuron* 37: 775–786.
24. tom Dieck S, Brandstatter JH (2006) Ribbon synapses of the retina. *Cell Tissue Res* 326: 339–346.
25. Zeitz C, Kloockener-Gruissem B, Forster U, Kohl S, Magyar I, et al. (2006) Mutations in CABP4, the gene encoding the Ca<sup>2+</sup>-binding protein 4, cause autosomal recessive night blindness. *Am J Hum Genet* 79: 657–667.
26. Sato S, Omori Y, Katoh K, Kondo M, Kanagawa M, et al. (2008) Pikachurin, a dystroglycan ligand, is essential for photoreceptor ribbon synapse formation. *Nat Neurosci* 11: 923–931.
27. Hartong DT, Berson EL, Dryja TP (2006) Retinitis pigmentosa. *Lancet* 368: 1795–1809.
28. Tokuyasu K, Yamada E (1959) The fine structure of the retina studied with the electron microscope. IV. Morphogenesis of outer segments of retinal rods. *J Biophys Biochem Cytol* 6: 225–230.
29. Fliegauf M, Benzing T, Omran H (2007) When cilia go bad: cilia defects and ciliopathies. *Nat Rev Mol Cell Biol* 8: 880–893.
30. Gerdes JM, Davis EE, Katsanis N (2009) The vertebrate primary cilium in development, homeostasis, and disease. *Cell* 137: 32–45.
31. Gao J, Cheon K, Nusinowitz S, Liu Q, Bei D, et al. (2002) Progressive photoreceptor degeneration, outer segment dysplasia, and rhodopsin mislocalization in mice with targeted disruption of the retinitis pigmentosa-1 (Rpl) gene. *Proc Natl Acad Sci U S A* 99: 5698–5703.
32. Zhao Y, Hong DH, Pawlyk B, Yue G, Adamian M, et al. (2003) The retinitis pigmentosa GTPase regulator (RPGR)-interacting protein: subserving RPGR function and participating in disk morphogenesis. *Proc Natl Acad Sci U S A* 100: 3965–3970.
33. Omori Y, Chaya T, Katoh K, Kajimura N, Sato S, et al. (2010) Negative regulation of ciliary length by ciliary male germ cell-associated kinase (Mak) is required for retinal photoreceptor survival. *Proc Natl Acad Sci U S A* 107: 22671–22676.
34. Cepko CL, Austin CP, Yang X, Alexiades M, Ezzeddine D (1996) Cell fate determination in the vertebrate retina. *Proc Natl Acad Sci U S A* 93: 589–595.
35. Olney JW (1968) An electron microscopic study of synapse formation, receptor outer segment development, and other aspects of developing mouse retina. *Invest Ophthalmol* 7: 250–268.
36. Blanks JC, Adinolfi AM, Lolley RN (1974) Synaptogenesis in the photoreceptor terminal of the mouse retina. *J Comp Neurol* 156: 81–93.
37. Blackshaw S, Harpavat S, Trimarchi J, Cai L, Huang H, et al. (2004) Genomic analysis of mouse retinal development. *PLoS Biol* 2: E247.
38. Blackshaw S, Fraioli RE, Furukawa T, Cepko CL (2001) Comprehensive analysis of photoreceptor gene expression and the identification of candidate retinal disease genes. *Cell* 107: 579–589.
39. de Melo J, Qiu X, Du G, Cristante L, Eisenstat DD (2003) Dlx1, Dlx2, Pax6, Brn3b, and Chx10 homeobox gene expression defines the retinal ganglion and inner nuclear layers of the developing and adult mouse retina. *J Comp Neurol* 461: 187–204.
40. Wakabayashi T, Kosaka J, Mori T, Takamori Y, Yamada H (2008) Doublecortin expression continues into adulthood in horizontal cells in the rat retina. *Neurosci Lett* 442: 249–252.
41. Siebert S, Scherf BG, Del Punta K, Didkovsky N, Heintz N, et al. (2009) Genetic address book for retinal cell types. *Nat Neurosci* 12: 1197–1204.
42. Corbo JC, Myers CA, Lawrence KA, Jadhav AP, Cepko CL (2007) A typology of photoreceptor gene expression patterns in the mouse. *Proc Natl Acad Sci U S A* 104: 12069–12074.
43. Hsiao TH, Diaconu C, Myers CA, Lee J, Cepko CL, et al. (2007) The cis-regulatory logic of the mammalian photoreceptor transcriptional network. *PLoS One* 2: e643.
44. Yoshida S, Mears AJ, Friedman JS, Carter T, He S, et al. (2004) Expression profiling of the developing and mature Nrl<sup>-/-</sup> mouse retina: identification of retinal disease candidates and transcriptional regulatory targets of Nrl. *Hum Mol Genet* 13: 1487–1503.
45. Corbo JC, Cepko CL (2005) A hybrid photoreceptor expressing both rod and cone genes in a mouse model of enhanced S-cone syndrome. *PLoS Genet* 1: e11.
46. Katoh K, Omori Y, Onishi A, Sato S, Kondo M, et al. (2010) Blimp1 suppresses Chx10 expression in differentiating retinal photoreceptor precursors to ensure proper photoreceptor development. *J Neurosci* 30: 6515–6526.
47. Kremer H, Pinckers A, van den Helm B, Deutman AF, Ropers HH, et al. (1994) Localization of the gene for dominant cystoid macular dystrophy on chromosome 7p. *Hum Mol Genet* 3: 299–302.
48. Stone EM, Kimura AE, Folk JC, Bennett SR, Nichols BE, et al. (1992) Genetic linkage of autosomal dominant neovascular inflammatory vitreoretinopathy to chromosome 11q13. *Hum Mol Genet* 1: 685–689.
49. Hughes AE, Lotery AJ, Silvestri G (1998) Fine localisation of the gene for central areolar choroidal dystrophy on chromosome 17p. *J Med Genet* 35: 770–772.
50. Bobola N, Briata P, Ilengo C, Rosatto N, Craft C, et al. (1999) OTX2 homeodomain protein binds a DNA element necessary for interphotoreceptor retinoid binding protein gene expression. *Mech Dev* 82: 165–169.
51. Koike C, Nishida A, Ueno S, Saito H, Sanuki R, et al. (2007) Functional roles of *Otx2* transcription factor in postnatal mouse retinal development. *Mol Cell Biol* 27: 8318–8329.
52. Livesey FJ, Furukawa T, Steffen MA, Church GM, Cepko CL (2000) Microarray analysis of the transcriptional network controlled by the photoreceptor homeobox gene *Crx*. *Curr Biol* 10: 301–310.
53. Liu Q, Tan G, Levenkova N, Li T, Pugh EN, Jr., et al. (2007) The proteome of the mouse photoreceptor sensory cilium complex. *Mol Cell Proteomics* 6: 1299–1317.
